# Supplementary material for: Glial cells maintain synapses by inhibiting an activity-dependent retrograde protease signal
Source: PLoS Genet. 2019 Mar 14;15(3):e1007948. doi: 10.1371/journal.pgen.1007948 (PMC6417855; doi:10.1371/journal.pgen.1007948)
Supplement: S1 Data — For each set of results, the age, genotype and dependent variable are given, as well as averages, standard deviations and statistical tests, are provided. (XLSX) [file pgen.1007948.s011.xlsx]

## Sheet: Sheet1
	Text
Age	E15.5	E15.5	E14.75	E14.25	E14.25	E15.5	E15.5	E15.5	E15.5	E18.5	E18.25	E15.5	E15.5	E15.5	E15.5	E15.5	E15.5	E14.75	E14.75	E14.25	E14.25	E15.5	E14.25	P15	Adult	E14.25	P15	Adult
Geno	Wnt1-DTA	Wnt1-DTA	WT	WT	erbB3 KO	WT	erbB3 KO	B3/ChAT dKO	B3/S25 dKO	WT	B3/S25 dKO	B3/a1 KO	WT	B3/F2 dKO	WT	B3/F2 dKO	B3 KO/F2 cKO	WT	erbB3 KO	WT	erbB3 KO	B3/P1 dKO	WT	WT	WT	WT	WT	WT
Variable	S100+cells	V+branches	Innerv NMJ%	Innerv NMJ%	Innerv NMJ%	NF+ branch	NF+ branch	NF+ branch	NF+ branch	Innerv NMJ%	Innerv NMJ%	NF+ branch	Syp+branch	Syp+branch	Innerv NMJ%	Innerv NMJ%	Syp+branch	fgl2 exp	fgl2 exp	FX exp	FX exp	Syp+branch	serpC1 exp	serpC1 exp	serpC1 exp	serpD1exp	serpD1exp	serpD1exp
	1.6	9	55	36	96	5	0	116	78	100	94	90	7	32	61	82	55	0.343	0.567	14.7	21.3	29	1.35	1.13	1	1.07	1.2	1
	0	3	39	38	83	7	1	73	128	95	99	72	4	45	81	88	45	0.636	0.658	17.3	19.8	27	1.07	1.24	1.13	1.31	1.3	1.2
	8.7	10	46	18	89	4	0	105	101	98	100	111	5	27	75	78	34			13.2	18.1	33	1.3	1.1	1	1.2	1.3	1.1
	4.7	6				5	1						6
						6	1						4
Mean	3.75	7	46.6667	30.6667	89.3333	5.4	0.6	98	102.333	97.6667	97.6667	91	5.2	34.6667	72.3333	82.6667	44.6667	0.4895	0.6125	15.0667	19.7333	29.6667	1.24	1.15667	1.04333	1.19333	1.26667	1.1
SD	3.83362	3.16228	8.02081	11.0151	6.50641	1.14018	0.547723	22.3383	25.0267	2.51661	3.21455	19.5192	1.30384	9.29157	10.2632	5.03322	10.504	0.207182	0.0643467	2.07445	1.60104	3.05505	0.149332	0.0737111	0.0750555	0.120139	0.057735	0.1
T					0.00136053		0.000183137												0.506791		0.0367679
	Figure 2D		Figure 4B													Figure 5D									Figure 6
Age	E15.5	E15.5	Explant	Explant	Explant	Explant	Explant	Explant	Explant	Explant	Explant	Explant	Explant	Explant	Explant	E15.5	E15.5	E15.5	E15.5	E15.5	E15.5	E15.5	E15.5	E15.5	Explant	Explant	Explant	Explant	Explant
Geno	WT	S25/B3 dKO	CTL	GDNF	T 100nM	T 200nM	T 400nM	T 800nM	T 200nM +H	MCM	MCM + 200 T	SCCM	SCCM + 200 T	ACM	ACM + 200 T	WT	B3/F2 dKO	B3 KO	WT	B3/PAR1 dKO	B3 KO	WT	B3 KO/F2 cKO	B3 KO	GDNF	WT, 200T	WT, 400 T	KO, 200 T	KO, 400 T
Variable	Innerv NMJ%	Innerv NMJ%	Surviv Axons (SA)	SA	SA	SA	SA	SA	SA	SA	SA	SA	SA	SA	SA	Innerv NMJ%	Innerv NMJ%	Innerv NMJ%	Innerv NMJ%	Innerv NMJ%	Innerv NMJ%	Innerv NMJ%	Innerv NMJ%	Innerv NMJ%	SA	SA	SA	SA	SA
	50	93	98	95	28	13	8	0	95	62	2	88	60	96	83	61	82	5	68	57	6	73	78	8	96	11	5	91	45
	81	87	87	92	33	21	14	0	90	63	3	92	84	92	78	81	88	3	60	74	7	65	82	6	93	13	7	94	51
	73	96	98	100	57	7	3	0	94	66	17	93	73	95	52	75	78	4	78	65	3	58	85	5	95	7	4	95	32
Mean	68	92	94.3333	95.6667	39.3333	13.6667	8.33333	0	93	63.6667	7.33333	91	72.3333	94.3333	71	72.3333	82.6667	4	68.6667	65.3333	5.33333	65.3333	81.6667	6.33333	94.6667	10.3333	5.33333	93.3333	42.6667
SD	16.0935	4.58258	6.35085	4.04145	15.5027	7.02377	5.50757	0	2.64575	2.08167	8.3865	2.64575	12.0139	2.08167	16.6433	10.2632	5.03322	1	9.0185	8.5049	2.08167	7.50555	3.51188	1.52753	1.52753	3.05505	1.52753	2.08167	9.71253
T			0.00430647	0.00297249					0.00227065	0.00479675	0.265056	0.00167297	0.00497699	0.00194373	0.00774294			5.97904e-06			0.000144281			2.21362e-06		8.93704e-07		1.30611e-06	0.000453021
										0.00113544																4.46852e-07		6.53054e-07	0.00022651
	S3D Fig			S6A Fig						S6B Fig						S7A Fig			S7B Fig
Age	E14.75	E14.75	E14.75	E14.75	E14.75	E14.75	E14.75	E14.75	E14.75	E14.25	P15	Adult	E14.25	P15	Adult	E14.75	E14.75	E14.75	Explant	Explant	Explant	Explant	Explant	Explant
Geno	WT vs. B3 KO	WT vs. B3 KO	WT vs. B3 KO	WT vs. B3 KO	WT vs. dKO	WT vs. B3 KO	WT vs. dKO	WT vs. B3 KO	B3 KO vs. dKO	WT	WT	WT	WT	WT	WT	WT vs. B3 KO	WT vs. B3 KO	WT vs. B3 KO	GDNF	GDNF	PAR1-AP-10	PAR1-AP-100	PAR4-AP-10	PAR4-AP-100
Variable	serpD1 exp fold	serpC1 exp fold	serpe2 exp fold	serpD1 exp fold	serpD1 exp fold	serpC1 exp fold	serpC1 exp fold	proT exp fold	proT exp fold	FII exp	FII exp	FII exp	FX exp	FX exp	FX exp	PAR1 exp fold	PAR3 exp fold	PAR4 exp fold	SA	SA	SA	SA	SA	SA
	13.7	5.4	1.3	6.1	7.3	6.6	7.4	1.2	0.2	15.1	8.2	1.3	8	13.9	0.95	0.5	1.2	1.3	93	97	97	37	95	99
	11	8.3	1.2	7.3	8.2	8.3	6.7	0.95	0.1	16.3	12.8	1.1	11.7	17.1	0.98	0.9	0.9	1.2	97	98	93	18	95	91
	7.2	4.1	0.9	8.1	5.6	7.5	8.1	0.8	0.1	7.9	14.3	0.95	14.5	15.1	1.2	1.3	0.7	1	98	91	95	39	98	93
Mean	10.6333	5.93333	1.13333	7.16667	7.03333	7.46667	7.4	0.983333	0.133333	13.1	11.7667	1.11667	11.4	15.3667	1.04333	0.9	0.933333	1.16667	96	95.3333	95	31.3333	96	94.3333
SD	3.26548	2.15019	0.208167	1.00664	1.32035	0.85049	0.7	0.202073	0.057735	4.54313	3.17857	0.175594	3.26037	1.61658	0.136504	0.4	0.251661	0.152753	2.64575	3.78594	2	11.5902	1.73205	4.16333
T																						0.00825454
